# Supplementary material for: Cluster Randomized Controlled Trial: Clinical and Cost-Effectiveness of a System of Longer-Term Stroke Care
Source: PubMed Central journal article supplement (PMC4512748; doi:10.1161/strokeaha.115.008585), 2015-07-27
Supplement: str-46-2212-s002.pdf [file str-46-2212-s002.pdf]

Advertisement

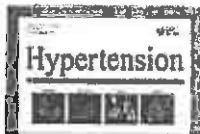

### Follow *Hypertension's* "Clinical Implications" Series—

A feature highlighting the clinical relevance of 3 select articles published in this issue.

[DONATE](#) [HELP](#) [CONTACT AHA](#) [HOME](#)

# AHA Journals

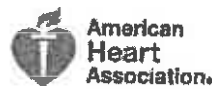

User Name:   
Password:  [LOG IN](#)

[Home](#) • [Subscriptions](#) • [Feedback](#) • [Help](#) • [Circulation Journals Home](#) • [AHA Journals Home](#)

Search:  [Advanced Search](#)

## Acknowledgment Permission Form

Journal:   
Manuscript No.:   
First author:   
Title of work:

### Acknowledgment Permission:

Authors must provide written permission/approval from all individuals mentioned by name in the Acknowledgements section of a submitted manuscript. By signing this form, any and all acknowledged persons therefore state that they have read and approved the mention of their names in the Acknowledgment section of the aforementioned paper.

Printed Name:   
Signature:   
Date:   
Printed Name:   
Signature:   
Date:   
Printed Name:   
Signature:   
Date:   
Printed Name:   
Signature:   
Date:

## Abstracts

from AHA Scientific Sessions

Late-Breaking  
Basic Science Abstracts  
from AHA Scientific Sessions

Advertisement

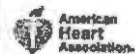

### A rare cause of severe hypertension

[Play Video](#)

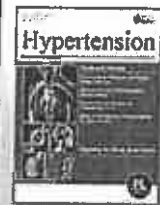

A recording from  
Hypertension  
Clinical-Pathological  
Conference,  
University of Glasgow

Advertisement

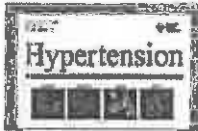

Follow *Hypertension's* "Clinical Implications" Series—  
A feature highlighting the clinical relevance of 3 select articles published in this issue.

[DONATE](#) [HELP](#) [CONTACT AHA](#) [HOME](#)

# AHA Journals

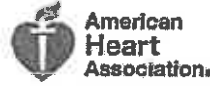

User Name   
Password  [LOG IN](#)

[Home](#) • [Subscriptions](#) • [Feedback](#) • [Help](#) • [Circulation Journals Home](#) • [AHA Journals Home](#)

Search  [Go](#) [Advanced Search](#)

## Acknowledgment Permission Form

Journal   
Manuscript No.   
First author   
Title of work

### Acknowledgment Permission:

Authors must provide written permission/approval from all individuals mentioned by name in the Acknowledgements section of a submitted manuscript. By signing this form, any and all acknowledged persons therefore state that they have read and approved the mention of their names in the Acknowledgment section of the aforementioned paper.

Printed Name   
Signature   
Date   
Printed Name   
Signature   
Date   
Printed Name   
Signature   
Date   
Printed Name   
Signature   
Date

**Abstracts**  
from AHA Scientific Sessions

**Late-Breaking  
Basic Science Abstracts**  
from AHA Scientific Sessions

Advertisement

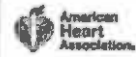

A rare cause  
of severe  
hypertension

[Play Video](#)

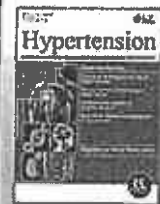

A recording from  
Hypertension  
Clinical-Pathological  
Conference,  
University of Glasgow

Advertisement

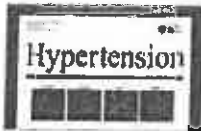

### Follow *Hypertension's* "Clinical Implications" Series—

A feature highlighting the clinical relevance of 3 select articles published in this issue.

[DONATE](#) [HELP](#) [CONTACT AHA](#) [HOME](#)

# AHA Journals

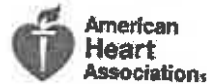

User Name  
  
Password

[LOGIN](#)

[Home](#) • [Subscriptions](#) • [Feedback](#) • [Help](#) • [Circulation Journals Home](#) • [AHA Journals Home](#)

Search   [Advanced Search](#)

## Acknowledgment Permission Form

Journal   
Manuscript No.   
First author   
Title of work

### Acknowledgment Permission:

Authors must provide written permission/approval from all individuals mentioned by name in the Acknowledgements section of a submitted manuscript. By signing this form, any and all acknowledged persons therefore state that they have read and approved the mention of their names in the Acknowledgment section of the aforementioned paper.

Printed Name   
Signature   
Date   
Printed Name   
Signature   
Date   
Printed Name   
Signature   
Date   
Printed Name   
Signature   
Date

## Abstracts

from AHA Scientific Sessions

Late-Breaking  
Basic Science Abstracts  
from AHA Scientific Sessions

Advertisement

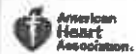

### A rare cause of severe hypertension

[▶ Play Video](#)

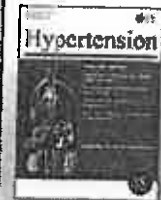

A recording from  
*Hypertension*  
Clinical-Pathological  
Conference  
University of Glasgow

**Acknowledgment Permission Form**

Journal Stroke

Manuscript No. 2014/008585

First author Forster A

Title of work

*Cluster randomised controlled trial: the clinical and cost effectiveness of a system of long-term stroke care.*

Acknowledgment Permission:

Authors must provide written permission/approval from all individuals mentioned by name in the Acknowledgements section of a submitted manuscript. By signing this form, any and all acknowledged persons therefore state that they have read and approved the mention of their names in the Acknowledgment section of the aforementioned paper.

Printed Name Professor Tony Rudd

Signature *[Signature]*

Date 3/12/14

Printed Name

Signature

**Acknowledgment Permission Form**

Journal Stroke

Manuscript No. 2014/008585

First author Forster Anne

Title of work Cluster randomised controlled trial

*the clinical and cost effectiveness of a system of long-term stroke care*

Acknowledgment Permission:

Authors must provide written permission/approval from all individuals mentioned by name in the Acknowledgements section of a submitted manuscript. By signing this form, any and all acknowledged persons therefore state that they have read and approved the mention of their names in the Acknowledgment section of the aforementioned paper.

Printed Name Allan House

Signature

*[Signature]* 1 Dec 2014

Date

Printed Name

Signature

Date

Printed Name

Signature

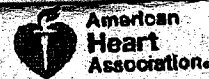

Password

**AHA Journals**

Home • Subscriptions • Feedback • Help • Circulation Journals Home • AHA Journals Home

Search

**Acknowledgment Permission Form**

Journal stroke

Manuscript No. 2014/008585

First author Forster

Title of work

*cluster randomised controlled trial the clinical and cost effectiveness of a system of long-term stroke care.*

Acknowledgment Permission:

Authors must provide written permission/approval from all individuals mentioned by name in the Acknowledgements section of a submitted manuscript. By signing this form, any and all acknowledged persons therefore state that they have read and approved the mention of their names in the Acknowledgment section of the aforementioned paper.

Printed Name Peter Wanklyn

Signature *[Signature]*

Date 9/12/14

Printed Name

Signature

Date

Printed Name

Signature

**Abstracts**

from AHA Scientific Sessions

Basic Science Abstracts

from AHA Scientific Sessions

**A rare cause of severe hypertension**

Play Video
